# Supplementary material
Source: Springer Nature journal article supplement (https://www.springermedizin.de/resource/supplementary/12888_2014_1651_MOESM1_ESM.pdf/9481084)

Patients referred to Arkin or de  
Viersprong: N=495

Not meeting inclusion criteria  
N=341

Patients meeting inclusion criteria  
N=154

Refusing to participate in the trial  
N=46

Patients signing informed consent  
N=108

Randomization and baseline  
assessment  
N=108

MBT-DH  
N=54

TAU  
N=54

Patients are measured  
at 6, 12, 18, 24, 30  
and 36 months after  
start of treatment

Patients are measured  
at 6, 12, 18, 24, 30  
and 36 months after  
start of treatment

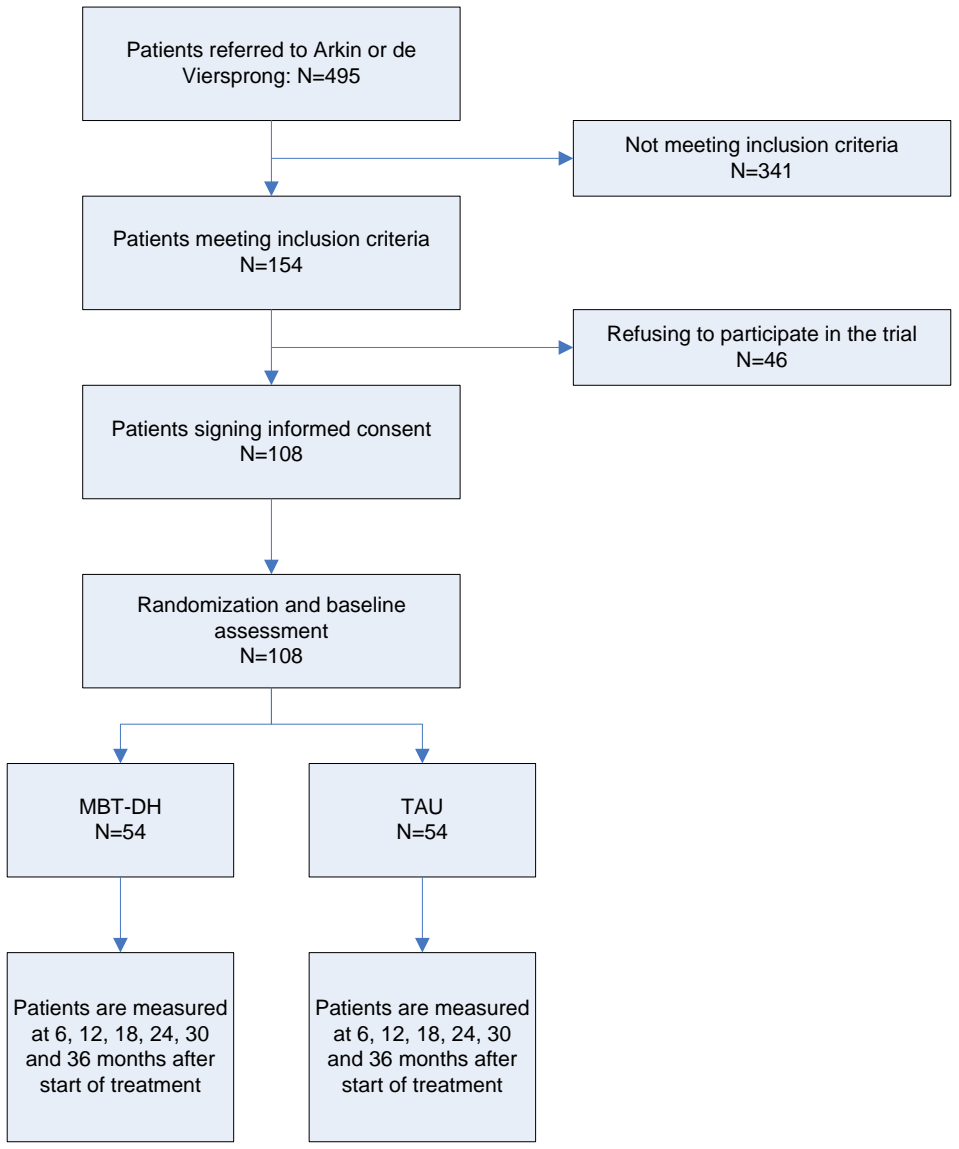

Supplement: MOESM1 [file 9481084]
